# Supplementary material for: Long-Term Neurological Outcomes in West Nile Virus–Infected Patients: An Observational Study
Source: PubMed Central journal article supplement (PMC4426557; doi:10.4269/ajtmh.14-0616), 2015-05-06
Supplement: SD8.pdf [file SD8.pdf]

SUPPLEMENTAL TABLE 1

Primary neurological exam findings on patients who had died prior to the time of the second assessment

| Acute disease | Demographics                         | Comorbid conditions                   | Primary exam: Years Postinfection | Primary exam: Abnormal neurological findings                                                                                                                                                            |
|---------------|--------------------------------------|---------------------------------------|-----------------------------------|---------------------------------------------------------------------------------------------------------------------------------------------------------------------------------------------------------|
| WNM           | 65-year-old male, Caucasian          | Hypertension                          | 3.8                               | Tremor in left hand                                                                                                                                                                                     |
| WNE           | 78-year-old male, Caucasian          | Hypertension<br>Diabetes              | 2.2                               | Abnormal hearing on left ear<br>Abnormal pinprick and vibratory sensation<br>Abnormal Romberg<br>Symmetric decreased reflexes<br>Abnormal tandem gait                                                   |
| WNE           | 86-year-old female, Caucasian        | Hypertension<br>Stroke                | 3                                 | Abnormal hearing<br>Abnormal vibratory sensation<br>Abnormal Romberg<br>Symmetric, decreased reflexes                                                                                                   |
| WNE           | 74-year-old male, Caucasian          | Hypertension<br>Stroke                | 3.1                               | Hearing loss prior to WNV<br>Right leg weakness<br>Abnormal tandem gait                                                                                                                                 |
| WNE           | 74-year-old male, Caucasian          | Hypertension<br>Diabetes              | 3.1                               | Hearing loss prior to WNV<br>Bilateral 5th digit contracture<br>Abnormal Romberg<br>Symmetric decreased reflexes<br>Abnormal heel walk<br>Abnormal toe walk<br>Wide-based gait<br>Abnormal tandem gait  |
| WNE           | 45-year-old male, Caucasian          | Hypertension<br>ETOH                  | 3.5                               | Symmetric increased reflexes<br>Tremor<br>Clonus present<br>Abnormal gait<br>Abnormal heel walk<br>Abnormal toe walk<br>Abnormal tandem gait                                                            |
| WNE           | 70-year-old male, Caucasian          | Hypertension<br>Stroke<br>Diabetes    | 3.4                               | Hearing loss prior to WNV<br>Abnormal pinprick and vibratory sensation<br>Abnormal Romberg<br>Abnormal gait<br>Abnormal heel walk<br>Abnormal toe walk<br>Abnormal tandem gait<br>Abnormal heel to shin |
| WNE           | 73-year-old male, Caucasian          | Hypertension<br>Stroke                | 2.8                               | Left arm weakness<br>Abnormal tandem gait                                                                                                                                                               |
| WNE           | 77-year-old male, Caucasian          | None                                  | 1.8                               | Right pupil nonreactive since birth<br>Left ankle weakness<br>Tremor<br>Abnormal Romberg<br>Abnormal gait<br>Abnormal heel walk<br>Abnormal toe walk<br>Abnormal tandem gait<br>Abnormal heel to shin   |
| WNE           | 55-year-old female, African American | Hypertension<br>Diabetes<br>Cataracts | 1.1                               | Lethargic<br>Abnormal vision<br>Right leg weakness<br>Tremor<br>Abnormal vibratory sensation<br>Abnormal gait<br>Abnormal heel walk<br>Abnormal toe walk<br>Abnormal tandem gait                        |
| WNE           | 79-year-old male, Caucasian          | None                                  | 3.4                               | Hearing loss in left ear<br>Abnormal light touch, pinprick, and vibratory sensation<br>Abnormal tandem gait                                                                                             |
| WNE           | 68-year-old male, Caucasian          | Hypertension<br>Stroke                | 0.8                               | Bilateral nystagmus<br>Decreased reflexes on left Achilles, increased symmetric reflexes biceps<br>Abnormal tandem gait                                                                                 |

ETOH = chronic alcohol use; WNF = West Nile fever; WNE = West Nile encephalitis; WNM = West Nile meningitis.

SUPPLEMENTAL TABLE 2

Neurological abnormalities observed during both primary and secondary assessments among participants in the Houston West Nile Virus cohort

| Acute disease | Demographics                         | Comorbid conditions         | First exam: Years postinfection | First exam: Abnormal neurological findings                                                                                                                                      | Second exam: Years Postinfection | Second exam: Abnormal neurological findings                                                                                                              |
|---------------|--------------------------------------|-----------------------------|---------------------------------|---------------------------------------------------------------------------------------------------------------------------------------------------------------------------------|----------------------------------|----------------------------------------------------------------------------------------------------------------------------------------------------------|
| WNF           | 75-year-old female, Caucasian        | None                        | 3.0                             | Abnormal hearing, unknown date of onset<br>Abnormal tandem gait                                                                                                                 | 11.2                             | Nonambulatory, nonverbal, aphasic, unresponsive to commands, severe contractions of all extremities with increased tone                                  |
| WNF           | 52-year-old male, Caucasian          | None                        | 1.1                             | Normal exam                                                                                                                                                                     | 8.3                              | Abnormal pinprick sensation<br>Left finger weakness<br>Abnormal tandem gait                                                                              |
| WNF           | 17-year-old female, Caucasian        | None                        | 1.9                             | Normal exam                                                                                                                                                                     | 9.3                              | Abnormal pinprick sensation                                                                                                                              |
| WNF           | 50-year-old female, Caucasian        | Hepatitis B                 | 0.9                             | Right arm weakness<br>Abnormal Romberg<br>Abnormal heel walk<br>Abnormal toe walk<br>Abnormal tandem gait                                                                       | 8.3                              | Abnormal pinprick sensation<br>Abnormal Romberg<br>Abnormal heel walk<br>Abnormal toe walk<br>Abnormal tandem gait                                       |
| WNM           | 58-year-old female, African American | Hypertension<br>Diabetes    | 3.3                             | Abnormal sensation to pinprick<br>Abnormal vibratory sensation<br>Abnormal tandem gait                                                                                          | 9.8                              | Abnormal sensation to pinprick<br>Abnormal vibratory sensation<br>Abnormal tandem gait                                                                   |
| WNM           | 48-year-old male, Caucasian          | ETOH<br>Hepatitis C         | 3.1                             | Abnormal hearing prior to WNV<br>Abnormal tandem gait                                                                                                                           | 10.2                             | Abnormal hearing<br>Abnormal pinprick sensation bilateral lower extremities<br>Bilateral lower extremity weakness<br>Abnormal tandem gait                |
| WNM           | 49-year-old male, Caucasian          | None                        | 2.3                             | Normal exam                                                                                                                                                                     | 8.9                              | Abnormal pinprick sensation bilateral lower extremities                                                                                                  |
| WNE           | 78-year-old male, Caucasian          | Hypertension                | 0.8                             | Abnormal hearing prior to WNV<br>Abnormal tandem gait                                                                                                                           | 8.0                              | Abnormal hearing<br>Symmetric decreased reflexes in upper and lower extremities<br>Abnormal tandem gait                                                  |
| WNE           | 76-year-old female, Caucasian        | Hypertension<br>Diabetes    | 3.1                             | Abnormal hearing prior to WNV<br>Abnormal tandem gait                                                                                                                           | 10.4                             | Abnormal hearing prior to WNV<br>Abnormal tandem gait                                                                                                    |
| WNE           | 60-year-old male, Caucasian          | Hypertension<br>CVA<br>ETOH | 3.0                             | Symmetric decreased reflexes in lower extremities                                                                                                                               | 10.4                             | Symmetric decreased reflexes in upper extremities and decreased reflexes in left lower extremity                                                         |
| WNE           | 64-year-old male, Caucasian          | Hypertension<br>ETOH        | 2.9                             | Abnormal hearing prior to WNV<br>Fine tremor                                                                                                                                    | 10.8                             | Abnormal hearing prior to WNV<br>Fine tremor                                                                                                             |
| WNE           | 49-year-old male, Caucasian          | None                        | 1.8                             | Left upper extremity weakness<br>Symmetric decreased reflexes                                                                                                                   | 9.3                              | Left upper extremity weakness<br>Symmetric decreased reflexes<br>Left upper extremity tremor                                                             |
| WNE           | 68-year-old male, Caucasian          | Hypertension                | 3.2                             | Abnormal hearing<br>Abnormal tandem gait<br>Fine tremor                                                                                                                         | 10.9                             | Abnormal hearing<br>Symmetric decreased strength<br>Tremor resolved<br>Abnormal tandem gait                                                              |
| WNE           | 70-year-old male, Caucasian          | Hypertension<br>CVA         | 3.1                             | Left ankle weakness<br>Decreased right quadriceps and increased left quadriceps reflexes<br>Abnormal Babinski<br>Abnormal Romberg<br>Abnormal heel walk<br>Abnormal tandem gait | 10.5                             | Decreased right quadriceps and increased left quadriceps reflexes<br>Abnormal Babinski<br>Abnormal Romberg<br>Abnormal heel walk<br>Abnormal tandem gait |
| WNE           | 51-year-old male, Hispanic           | Diabetes                    | 2.9                             | Decreased reflexes on right upper extremity, bilateral lower extremities<br>Abnormal tandem gait                                                                                | 10.3                             | Symmetric decreased upper extremity reflexes<br>Abnormal tandem gait                                                                                     |
| WNE           | 72-year-old male, Caucasian          | Hypertension<br>Diabetes    | 2.8                             | Tongue deviation to right<br>Abnormal hearing<br>Abnormal vibratory sensation<br>Abnormal heel walk<br>Abnormal toe walk<br>Abnormal tandem gait                                | 10.6                             | Tongue deviation resolved<br>Abnormal hearing<br>Abnormal heel walk<br>Abnormal toe walk<br>Abnormal tandem gait                                         |
| WNE           | 67-year-old female, Caucasian        | CVA                         | 2.3                             | Right upper extremity weakness                                                                                                                                                  | 9.0                              | Right upper extremity and left hand weakness<br>Decreased right bicep, brachioradialis, tricep reflexes, and decreased left tricep reflex                |

ETOH = chronic alcohol use; WNF = West Nile fever; WNE = West Nile encephalitis; WNM = West Nile meningitis.
